# Supplementary material for: Grafting Eggplant Onto Underutilized Solanum Species and Biostimulatory Action of Azospirillum brasilense Modulate Growth, Yield, NUE and Nutritional and Functional Traits
Source: MDPI journal article supplement (doi:10.3390/horticulturae8080722), 2022-08-11
Supplement: s1 [file s1]

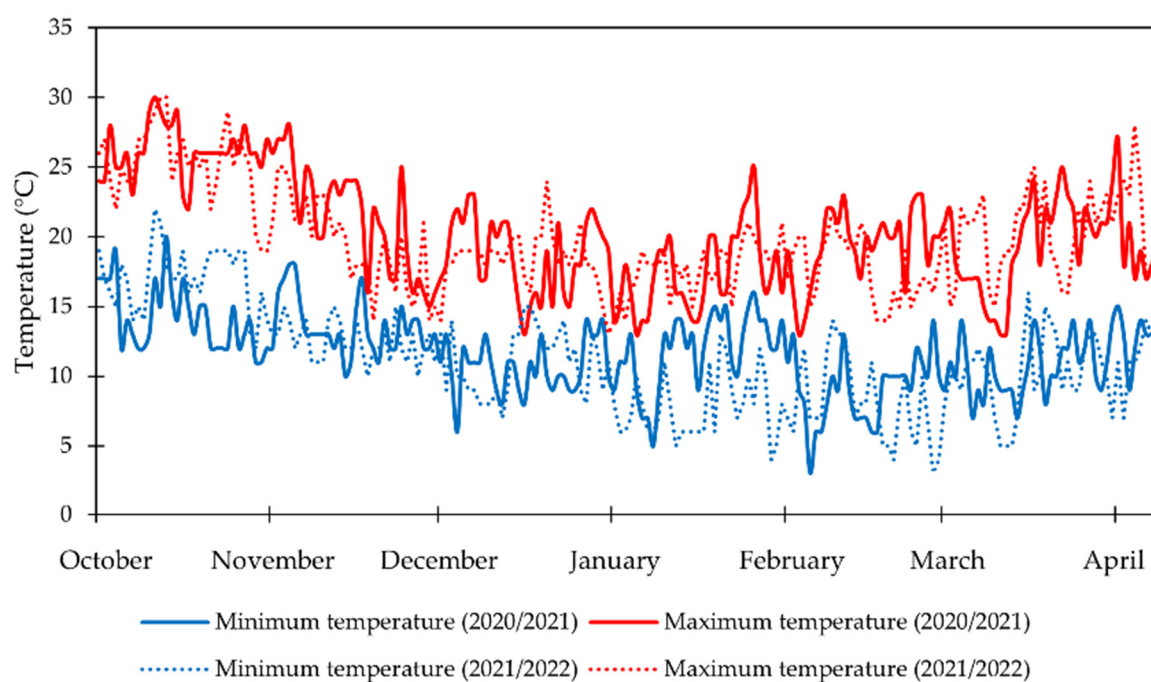

**Figure S1.** Maximum and minimum temperatures recorded during the two cultivation cycles.

**Table S1.** Significance of three-way ANOVA analysis (type of plant  $\times$  biostimulant  $\times$  year).

| Variables                      | Type of plant<br>(T) | Biostimulant<br>(B) | Year (Y) | T $\times$ B | T $\times$ Y | B $\times$ Y | T $\times$ B $\times$ Y |
|--------------------------------|----------------------|---------------------|----------|--------------|--------------|--------------|-------------------------|
| Plant height 50 DAT            | ***                  | ***                 | NS       | NS           | NS           | NS           | NS                      |
| N. leaves 50 DAT               | ***                  | ***                 | NS       | *            | NS           | NS           | NS                      |
| Total yield                    | ***                  | *                   | NS       | NS           | NS           | NS           | NS                      |
| Marketable yield               | ***                  | ***                 | NS       | NS           | NS           | NS           | NS                      |
| Number of marketable fruits    | ***                  | **                  | NS       | NS           | NS           | NS           | NS                      |
| Mean mass of marketable fruits | ***                  | ***                 | NS       | NS           | NS           | NS           | NS                      |
| Fruit dry matter               | NS                   | *                   | NS       | NS           | NS           | NS           | NS                      |
| Firmness                       | NS                   | ***                 | NS       | NS           | NS           | NS           | NS                      |
| SSC                            | ***                  | ***                 | NS       | NS           | NS           | NS           | NS                      |
| P                              | ***                  | NS                  | NS       | NS           | NS           | NS           | NS                      |
| K                              | ***                  | NS                  | NS       | NS           | NS           | NS           | NS                      |
| Ca                             | ***                  | NS                  | NS       | NS           | NS           | NS           | NS                      |
| Mg                             | ***                  | ***                 | NS       | NS           | NS           | NS           | NS                      |
| Proteins                       | ***                  | ***                 | NS       | *            | NS           | NS           | NS                      |
| NUE                            | ***                  | *                   | NS       | NS           | NS           | NS           | NS                      |
| Ascorbic acid                  | ***                  | ***                 | NS       | ***          | NS           | NS           | NS                      |
| Chlorogenic acid               | ***                  | ***                 | NS       | NS           | NS           | NS           | NS                      |
| Total anthocyanins             | ***                  | ***                 | NS       | NS           | NS           | NS           | NS                      |
| Glycoalkaloids                 | ***                  | ***                 | NS       | **           | NS           | NS           | NS                      |

\*\*\* statistically significant differences at  $p$ -value below 0.001; \*\* statistically significant differences at  $p$ -value below 0.01;

\* statistically significant differences at  $p$ -value below 0.05; NS, not significant.
